# Supplementary material for: In vivo cell type-specific CRISPR knockdown of dopamine beta hydroxylase reduces locus coeruleus evoked wakefulness
Source: PubMed Central journal article supplement (PMC6283864; doi:10.1038/s41467-018-07566-3), 2018-12-06
Supplement: 41467_2018_7566_MOESM1_ESM.pdf [file 41467_2018_7566_MOESM1_ESM.pdf]

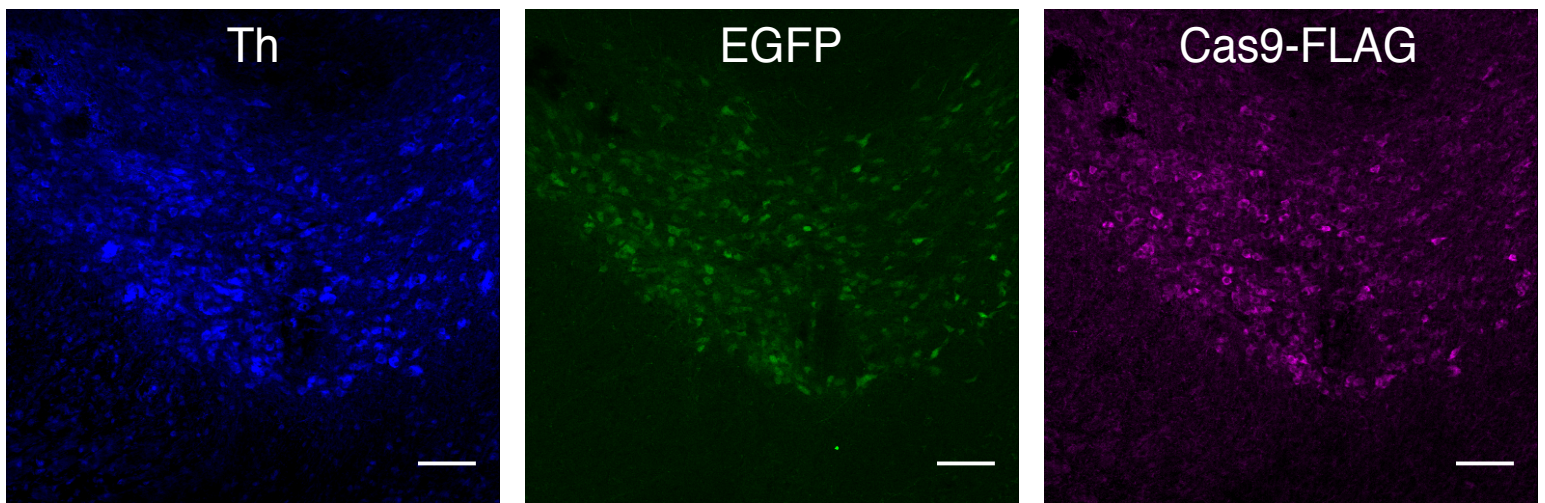

**Supplementary Figure 1.** Representative immunofluorescence images of Th, EGFP and Cas9-FLAG in the ventral tegmental area from Th/Cas9 mice. Scale bar, 100 $\mu$ m

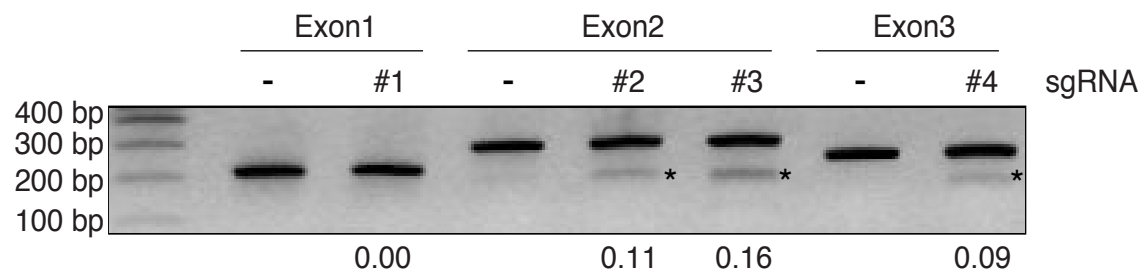

**Supplementary Figure 2.** Agarose gel electrophoresis of T7 endonuclease I-treated PCR products derived from NIH3T3 cells transfected with sgRNAs and Cas9. The numbers indicate the ratio of cleaved vs uncleaved PCR products.

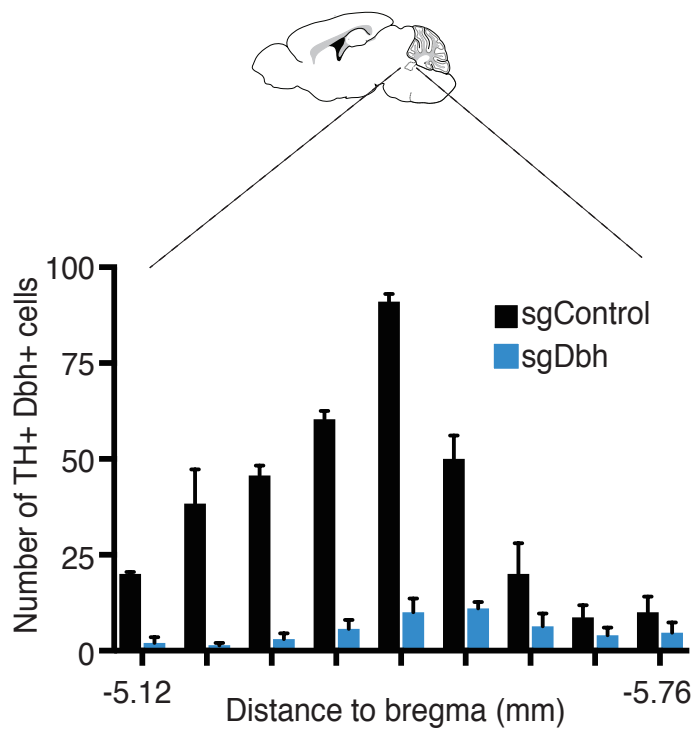

**Supplementary Figure 3.** (a) Quantification of Dbh and Th-double positive cells in LC neurons from Th/Cas9 mice injected with AAV-DJ sgDbh or AAV-DJ sgControl in 40  $\mu$ m brain sections from the rostral-to-caudal ends of the LC (anteroposterior, -5.12 to -5.76). Cell counts are plotted as mean  $\pm$  s.e.m (n = 3 mice). The LC was defined by the Allen Reference Atlas<sup>26</sup>.

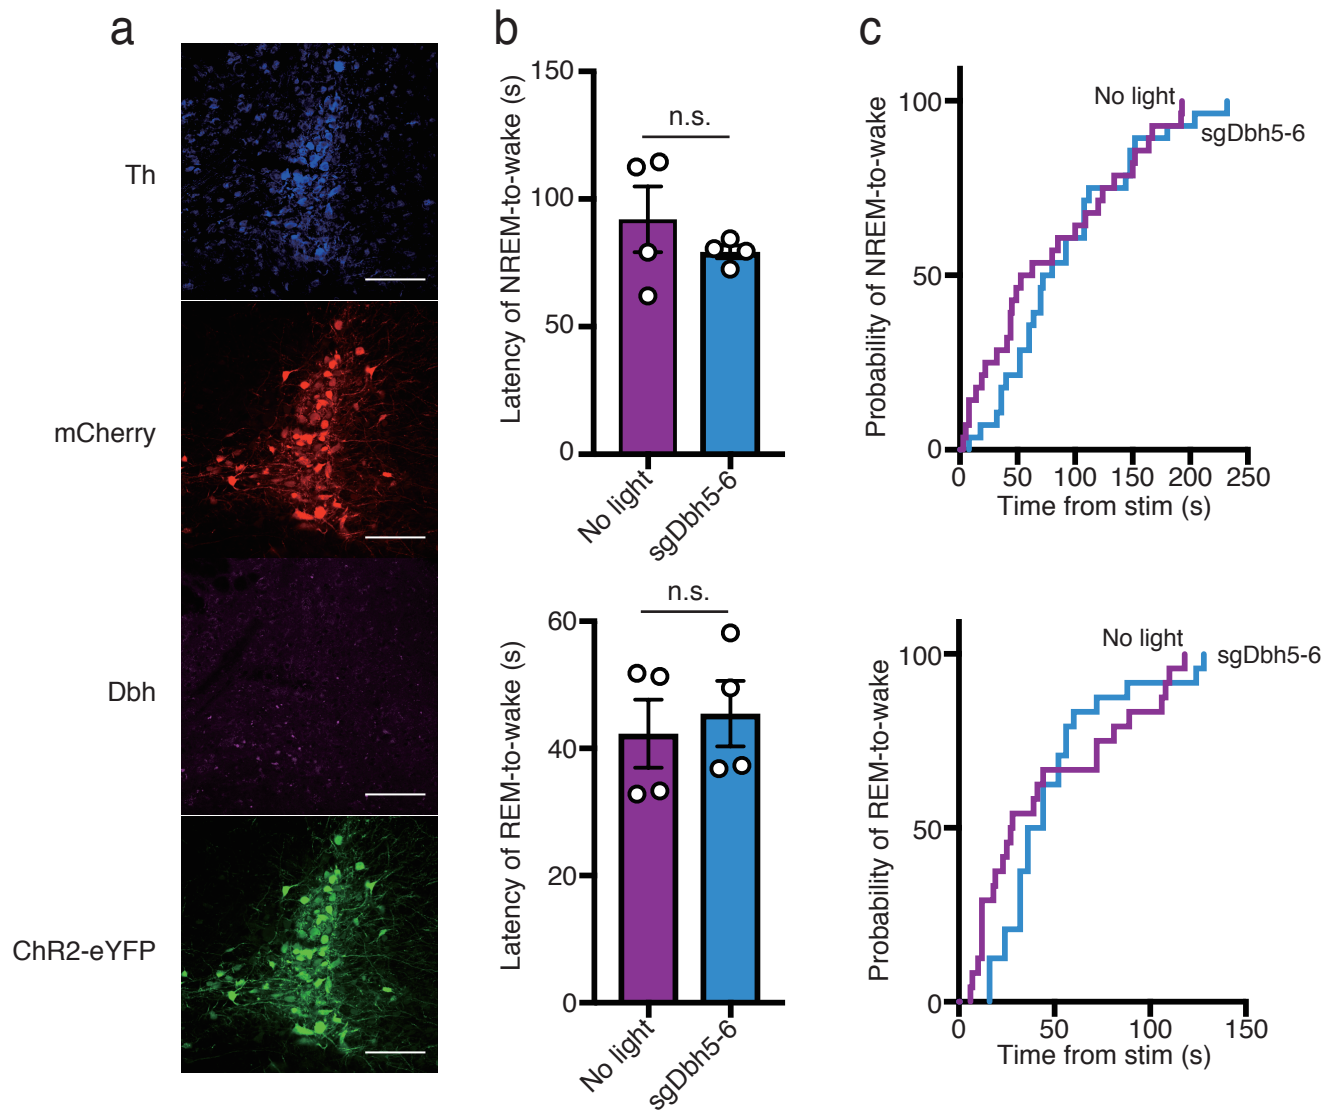

**Supplementary Figure 4.** The disruption of *dbh* gene using re-designed sgRNAs. (a) Representative immunofluorescence images of the LC from Th/Cas9 mice injected with AAV-DJ sgDbh5-6 together with AAV-DJ DIO ChR2. Scale bar, 100  $\mu$ m. (b) Latencies (mean $\pm$ s.e.m) to wake during NREM (top) or REM (bottom) sleep following the unilateral photostimulation (10-ms pulses at 20 Hz for 10 s) of LC neurons in a Th/Cas9 mouse injected with AAV-DJ sgDbh together with AAV-DJ DIO ChR2 ( $n = 4$ ; mean latency of 6-7 stimulations per each mice are plotted) (not significant (n.s.) by two-tailed Student t-test between No light and sgDbh5-6;  $p = 0.3680$  (NREM) and  $0.6883$  (REM)  $t = 0.9702$  (NREM) and  $2.382$  (PFC),  $df = 6$  (NREM) and  $6$  (REM)) (c) Cumulative distribution of sleep-to-wake transitions following the unilateral photostimulation (10-ms pulses at 20 Hz for 10 s) of LC neurons during NREM (top) or REM sleep (bottom).

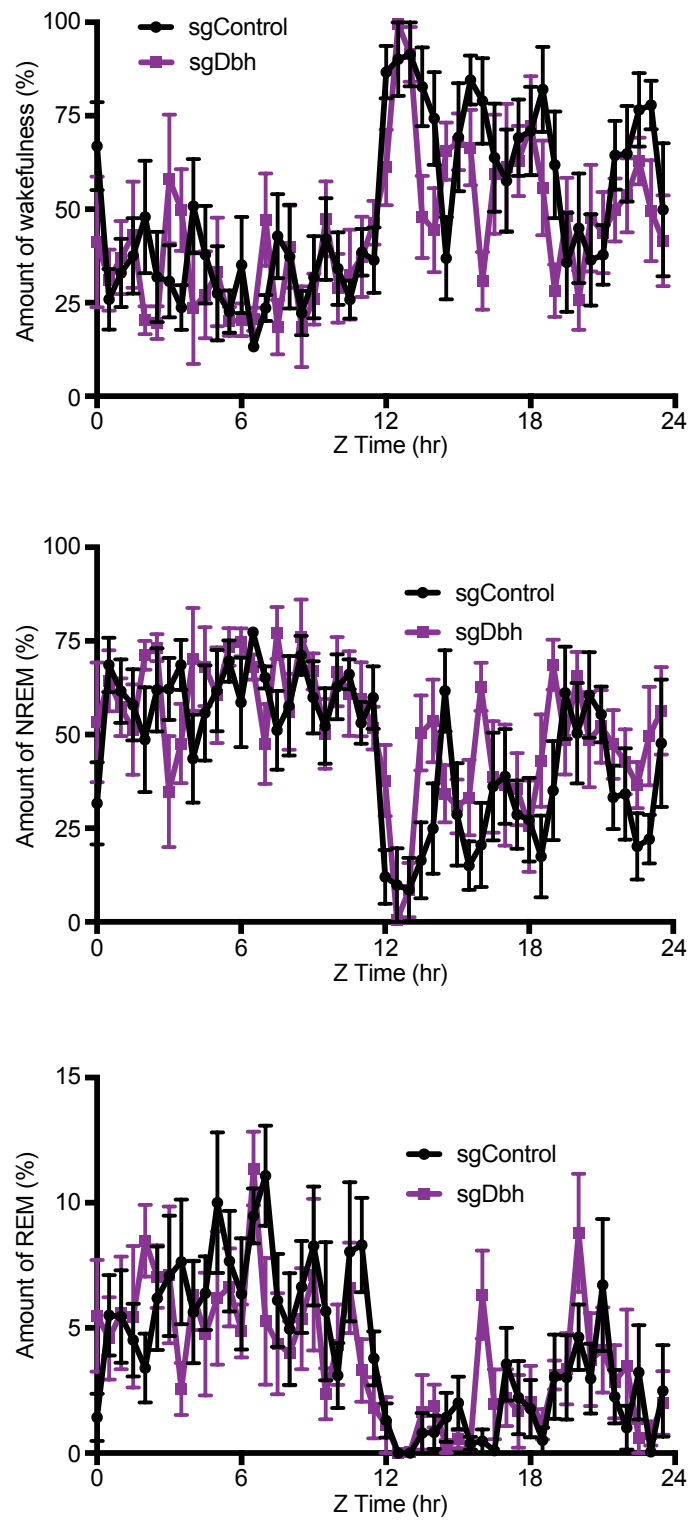

**Supplementary Figure 5.** Percent (mean  $\pm$  s.e.m) time spent in wakefulness (top), NREM (middle) or REM (bottom) sleep during 24 h in Control and sgDbh-treated mice.
